# Supplementary material
Source: Springer Nature journal article supplement (https://www.springermedizin.de/resource/supplementary/13221_2013_56_MOESM5_ESM.pdf/9680900)

**A**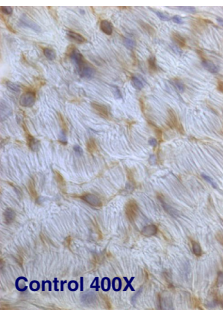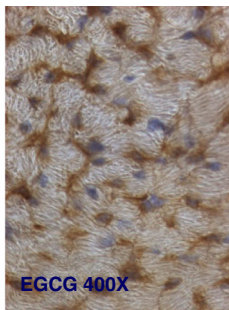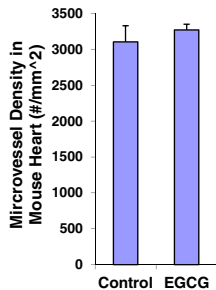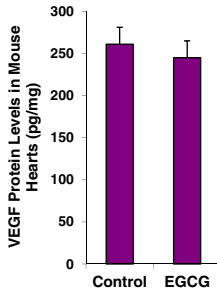**B**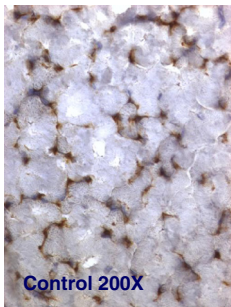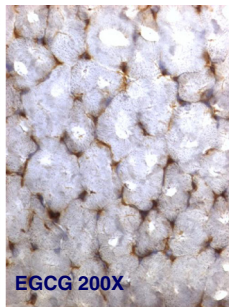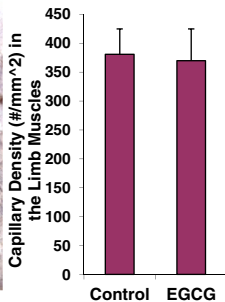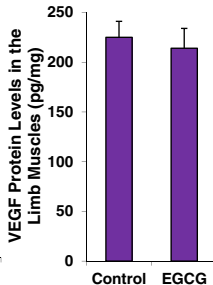

Supplement: MOESM5 [file 9680900]
